# Supplementary material for: Chemo-Profiling of Illicit Amphetamine Tablets Seized from Jazan, Saudi Arabia, Using Gas Chromatography-Mass Spectrometry and Chemometric Techniques
Source: Hindawi journal article supplement (doi:10.1155/2021/1517785), 2021-10-06
Supplement: f1 [file 1517785.f1.doc]

TABLE 1S: GC-MS analyses of amphetamine tablets collected from different cities of Jazan province. Ten tablets of Amphetamine were analyzed in triplicate from three different cities each, Ahad Al Masaraha, Darb and Jazan

| Compounds | **Average % area calculated*** | | | | | | | | | | | | | | | | | | | | | | | | | | | | | |
| --- | --- | --- | --- | --- | --- | --- | --- | --- | --- | --- | --- | --- | --- | --- | --- | --- | --- | --- | --- | --- | --- | --- | --- | --- | --- | --- | --- | --- | --- | --- |
| **AHAD** | | | | | | | | | | **DARB** | | | | | | | | | | **JAZAN** | | | | | | | | | |
| **1** | **2** | **3** | **4** | **5** | **6** | **7** | **8** | **9** | **10** | **1** | **2** | **3** | **4** | **5** | **6** | **7** | **8** | **9** | **10** | **1** | **2** | **3** | **4** | **5** | **6** | **7** | **8** | **9** | **10** |
| Amphetamine | 38.96 | 36.46 | 31.93 | 25.3 | 33.36 | 17.55 | 41.23 | 23.18 | 40.43 | 32.03 | 30.31 | 37.2 | 31.66 | 34.4 | 36.71 | 27.19 | 16.29 | 20.8 | 31.3 | 35.5 | 39.2 | 18.4 | 32.9 | 17.3 | 36.4 | 33.54 | 38.31 | 24.22 | 22.31 | 26.35 |
| N-Formylamphetamine | 2.63 | 2.68 |  | 2.7 |  |  |  |  |  |  |  |  | 1.54 | 2.5 |  |  |  |  | 1.7 |  |  |  |  | 2.4 |  |  |  |  | 2.1 | 2.9 |
| Ether, methyl diphenylmethyl | 3.78 | 3.47 | 28.63 | 8.4 | 8.99 | 23.01 | 6.6 | 20.12 | 9.2 |  | 25.81 |  |  | 3.45 | 22.8 | 27.3 | 15.81 | 28.01 | 4.9 | 10.14 |  | 15.52 | 18.33 | 22.89 | 26.43 | 21.41 | 19.05 | 17.37 | 18.09 |  |
| Caffeine | 14.21 | 13.85 | 13 | 9.3 | 10.91 | 14.23 | 15.6 | 21.27 | 15.25 | 18.35 | 10.18 | 14.66 | 13.52 | 14.53 |  |  | 10.89 | 18.9 | 19.99 | 17.04 | 10.82 | 14.51 | 17.04 | 12.26 | 20.43 | 25.71 | 22.31 | 10.6 | 13.45 | 17.28 |
| Lidocaine | 20.16 | 21.14 |  | 23.6 | 18.45 |  |  |  | 14.67 | 8.3 |  | 20 | 26.1 | 21.49 |  |  |  |  |  |  | 17.33 |  | 18.37 | 12.98 |  |  |  |  |  | 16.52 |
| 3-Eicosene | 2.5 |  |  |  | 2.54 | 2.55 | 4.1 |  |  | 8.36 |  |  |  |  |  |  |  |  |  |  |  |  |  |  |  |  |  |  |  |  |
| 1-Dodecanol,2-octyl |  | 4.76 | 4.95 | 4.8 | 2.91 | 3.4 | 3.2 | 2.32 | 2.49 | 2.35 | 1.9 | 2.76 | 2.51 | 2.43 | 3.58 | 5.26 | 8.65 | 4.2 | 8.4 | 4.1 |  |  | 5.9 | 3.8 | 7.4 | 6.88 |  |  | 2.31 |  |
| Z-8-Methyl-9-tetradecenoic acid |  |  | 2.39 |  |  |  |  |  |  |  |  |  |  |  |  | 2.21 |  |  |  |  |  |  |  |  |  |  |  |  |  |  |
| N,N-di-(phenylisopropyl)formamide |  |  | 1.93 |  |  | 2.03 | 3.1 | 1.7 |  | 1.88 | 1.75 |  |  |  |  |  | 1.8 | 1.4 | 3.5 | 2.6 |  | 3.1 |  | 2.8 | 2.4 | 2.8 | 2.5 | 1.6 | 1.4 | 1.9 |
| 1-Dodecanol,2-hexyl |  |  | 1.88 | 3.8 | 2.3 | 2.85 | 8.2 | 4.07 | 2.13 | 9.98 |  | 2.29 | 2.25 | 2.48 | 2.58 | 3.05 | 2.37 | 2.5 | 6.4 | 8.02 |  |  |  | 2.3 |  |  | 2.05 |  | 1.6 | 5.89 |
| n-Nonadecanol-1 |  |  | 1.83 |  |  |  |  |  |  |  |  |  | 1.9 |  | 2.51 |  |  |  |  |  |  |  |  |  |  | 1.76 |  | 1.99 | 1.04 | 1.73 |
| E-15-Heptadecenal |  |  |  | 2.5 |  |  |  |  |  |  |  |  |  | 1.73 |  | 2.63 | 2.09 | 1.54 | 1.39 | 1.91 |  |  |  |  |  | 2.99 |  |  |  |  |
| Silane,butyltrimethoxy |  |  |  | 1.6 |  | 1.75 | 1.3 |  |  | 1.66 |  |  |  |  |  | 1.93 | 1.55 |  | 1.58 |  |  |  |  |  |  |  |  |  | 1.94 |  |
| di-(-phenylisopropyl)amine |  |  |  | 1.4 | 1.77 | 1.91 | 1.4 | 1.58 |  | 21.31 |  |  |  |  |  |  | 2.17 |  | 1.9 | 3.2 |  | 18.4 |  | 21.5 | 17.3 | 18.4 | 12.18 |  | 16.4 |  |
| 1,8-Dimethyl-3,6-diazahomoadamantan-9-one |  |  |  | 1.3 | 1.52 |  |  |  |  |  |  |  |  |  |  |  |  |  |  |  |  |  |  |  |  |  |  | 1.44 |  |  |
| 1-Octadecene |  |  |  |  | 1.69 |  |  |  |  |  |  |  |  |  |  |  |  |  |  |  |  | 1.45 |  | 1.27 | 1.33 |  |  |  |  |  |
| Dimenhydrinate |  |  |  |  |  | 7.23 | 5.2 | 4.88 |  |  |  |  |  |  | 2.5 | 3.98 | 12.62 |  | 12.1 | 10.11 | 7.1 | 10.11 | 6.21 | 2.05 | 3.07 | 13.05 | 3.66 |  | 3.65 |  |
| Benzeneacetic acid,4-pentadecyl ester |  |  |  |  |  | 1.61 |  |  |  |  |  |  |  |  |  | 1.64 |  |  |  |  |  |  |  |  |  |  |  |  |  |  |
| Hexadecanoic acid, methyl ester |  |  |  |  |  | 1.43 |  | 1.78 |  |  |  |  |  |  | 2.14 | 1.49 | 1.42 |  | 1.51 |  |  | 1.20 |  | 1.82 |  |  | 1.22 |  | 1.93 |  |
| 1-Piperidinepropanol,alpha-cyclohexyl-alpha,-phenyl |  |  |  |  |  | 1.18 |  |  |  |  |  |  |  |  |  |  | 1.36 |  | 1.51 |  |  |  |  |  |  |  |  |  |  |  |
| 3-Octadecene |  |  |  |  |  | 1.9 | 1.7 | 1.4 |  | 1.92 |  |  |  |  |  |  |  |  |  |  |  |  |  |  |  |  |  |  |  |  |
| Hexadecane, 1-chloro |  |  |  |  |  |  | 1.1 |  |  |  |  |  |  |  |  |  |  |  |  |  |  |  |  |  |  |  |  |  |  |  |
| Tetradecane, 1-chloro |  |  |  |  |  |  |  | 1.36 |  |  |  |  |  |  |  |  | 1.23 |  |  | 1.9 |  |  |  |  |  |  |  |  |  |  |
| Isoquinoline,1-[3-methoxy-5-hydroxybenzyl]-1,2,3,4-tetrahydro-6-methoxy |  |  |  |  |  |  |  |  | 2.06 |  |  |  |  |  |  |  |  |  |  |  |  |  |  |  |  |  |  |  |  |  |
| 5-(2-Propenylidene)-10,11-dihydro-5H-dibenzo[a,d]cycloheptene |  |  |  |  |  |  |  |  |  | 4.97 |  |  |  |  |  |  |  |  |  |  |  |  |  |  |  |  |  |  |  |  |
| 13-Docosenamide |  |  |  |  |  |  |  |  |  |  | 2.93 | 2.49 |  |  |  |  |  |  |  |  | 2.11 | 2.34 | 2.56 | 2.93 | 1.99 | 2.08 | 2.49 | 2.07 |  |  |
| 1-Hexadecanol,2-methyl |  |  |  |  |  |  |  |  |  |  | 2.75 |  |  |  |  |  |  |  |  |  | 2.88 | 6.8 |  |  | 2.11 | 1.09 |  | 2.03 |  |  |
| Cycloeicosane |  |  |  |  |  |  |  |  |  |  | 1.95 | 1.98 | 1.995 | 1.87 | 2.71 |  |  | 2.63 |  |  |  |  |  | 2.11 | 2.9 |  | 1.69 |  |  | 1.51 |
| Heptacosane |  |  |  |  |  |  |  |  |  |  |  |  | 2.21 | 1.91 | 2.8 |  | 1.47 |  | 1.57 |  |  |  |  |  |  |  |  |  |  |  |
| Dimethylbenzylamine |  |  |  |  |  |  |  |  |  |  |  |  | 1.49 |  |  |  |  |  |  |  |  |  |  |  |  |  |  |  |  |  |
| Eicosene |  |  |  |  |  |  |  |  |  |  |  |  |  |  |  | 3.44 |  |  |  |  |  |  |  |  |  |  |  |  |  |  |
| 9-Octadecenoic acid (Z)-, methyl ester |  |  |  |  |  |  |  |  |  |  |  |  |  |  |  | 1.69 | 1.1 |  |  |  | 1.23 | 1.4 |  | 1.8 |  |  |  |  |  |  |
| 9-Octadecenamide |  |  |  |  |  |  |  |  |  |  |  |  |  |  |  |  | 1.67 | 1.6 |  | 1.4 |  |  |  |  |  |  |  |  | 1.04 | 1.8 |
| Benzenepropanoic acid,3,5-bis(1,1-dimethylethyl)-4-hydroxy-,methyl ester |  |  |  |  |  |  |  |  |  |  |  |  |  |  |  |  | 0.94 |  |  |  |  |  |  |  |  |  |  |  | 1.3 |  |
| Dextromethorphan |  |  |  |  |  |  |  |  |  |  |  |  |  |  |  |  | 0.91 |  | 1.1 |  |  | 1.4 |  |  |  | 1.8 |  |  | 1.5 |  |
| Formetorex |  |  |  |  |  |  |  |  |  |  |  |  |  |  |  |  | 0.84 |  |  |  |  |  |  |  |  |  |  |  |  |  |
| Erucic acid |  |  |  |  |  |  |  |  |  |  |  |  |  |  |  |  | 0.82 |  |  |  |  |  |  |  |  |  |  |  | 1.4 |  |
| Deoxycholic acid,di(trimethylsilyl) ether |  |  |  |  |  |  |  |  |  |  |  |  |  |  |  |  |  |  |  |  | 4.5 |  |  |  |  |  |  |  |  |  |
| Hexadecanoic acid,trimethylsilyl ester |  |  |  |  |  |  |  |  |  |  |  |  |  |  |  |  |  |  |  |  | 3.9 |  |  |  |  |  |  |  |  |  |
| Trans-9-Octadecenoic acid, trimethylsilyl ester |  |  |  |  |  |  |  |  |  |  |  |  |  |  |  |  |  |  |  |  |  |  |  |  |  |  |  |  |  |  |
| Oleic Acid |  |  |  |  |  |  |  |  |  |  |  |  |  |  |  |  |  |  |  |  | 3.04 | 4.5 |  |  |  |  |  |  |  |  |
| Glycine,N-[(3 α,5β,7α,12α)-24-oxo-3,7,12-tris[(trimethylsilyl)oxy]cholan-24-yl]-methyl ester |  |  |  |  |  |  |  |  |  |  |  |  |  |  |  |  |  |  |  |  | 1.3 |  |  |  |  |  |  |  |  |  |
| 6-Octadecenoic acid, trimethylsilyl ester |  |  |  |  |  |  |  |  |  |  |  |  |  |  |  |  |  |  |  |  | 2.9 |  |  |  |  |  |  |  |  |  |
| 7-Methyl-Z-tetradecen-1-ol acetate |  |  |  |  |  |  |  |  |  |  |  |  |  |  |  |  |  |  |  |  | 1.06 |  |  |  |  |  |  |  |  |  |
| Cis-9-Hexadecenoic acid, trimethylsilyl ester |  |  |  |  |  |  |  |  |  |  |  |  |  |  |  |  |  |  |  |  | 1.2 |  |  |  |  |  |  |  |  |  |
| Cis-13-Eicosenoic acid |  |  |  |  |  |  |  |  |  |  |  |  |  |  |  |  |  |  |  |  | 2.7 |  |  |  |  |  |  |  |  |  |
| Methyl stearate |  |  |  |  |  |  |  |  |  |  |  |  |  |  |  |  |  |  |  |  | 6.5 |  |  |  |  |  |  |  | 4.3 |  |
| Palmtic Acid |  |  |  |  |  |  |  |  |  |  |  |  |  |  |  |  |  |  |  |  | 4.2 |  |  |  | 3.7 |  |  |  |  |  |
| Octadecenoic acid, trimethylsilyl ester |  |  |  |  |  |  |  |  |  |  |  |  |  |  |  |  |  |  |  |  | 3.8 |  |  |  |  |  |  |  |  |  |
| Ethyl iso-allocholate |  |  |  |  |  |  |  |  |  |  |  |  |  |  |  |  |  |  |  |  | 1.2 |  |  |  |  |  |  |  |  |  |
| 1-Piperidinepropanol |  |  |  |  |  |  |  |  |  |  |  |  |  |  |  |  |  |  |  |  |  | 3.4 |  |  |  |  |  |  |  |  |
| 1-Hexadecanesulfonyl chloride |  |  |  |  |  |  |  |  |  |  |  |  |  |  |  |  |  |  |  |  |  |  |  | 2.7 |  |  |  |  |  |  |
| 1-Piperidinepropanol,α-cyclohexyl-α-phenyl |  |  |  |  |  |  |  |  |  |  |  |  |  |  |  |  |  |  |  |  |  |  |  |  |  | 3.1 |  |  |  |  |
| Cyclopentane, (4-octyldodecyl) |  |  |  |  |  |  |  |  |  |  |  |  |  |  |  |  |  |  |  |  |  |  |  |  |  |  | 1.2 |  |  |  |
| Octatriacontyl pentafluoropropionate |  |  |  |  |  |  |  |  |  |  |  |  |  |  |  |  |  |  |  |  |  |  |  |  |  |  |  | 1.8 |  |  |
| Heptasiloxane,1,1,3,3,5,5,7,7,9,9,11,11,13,13-tetradecamethyl |  |  |  |  |  |  |  |  |  |  |  |  |  |  |  |  |  |  |  |  |  |  |  |  |  |  |  | 1.3 |  |  |
| Octaasiloxane,1,1,3,3,5,5,7,7,9,9,11,11,13,13,15,15-hexadecamethyl |  |  |  |  |  |  |  |  |  |  |  |  |  |  |  |  |  |  |  |  |  |  |  |  |  |  |  | 1.6 |  |  |
| Cyclohexasiloxane, dodecamethyl |  |  |  |  |  |  |  |  |  |  |  |  |  |  |  |  |  |  |  |  |  |  |  |  |  |  |  |  | 1.2 |  |
| Octadecane |  |  |  |  |  |  |  |  |  |  |  |  |  |  |  |  |  |  |  |  |  |  |  |  |  |  |  |  | 1.9 |  |

*n = 3
